# Supplementary material
Source: PubMed Central journal article supplement (PMC3266168)

# **Discovery of a novel and potent class of *F. tularensis* enoyl-reductase (FabI) inhibitors by molecular shape and electrostatic matching**

## **Supporting Information**

Kirk E. Hevener<sup>†‡</sup>, Shahila Mehboob<sup>†‡</sup>, Pin-Chih Su<sup>†</sup>, Kent Truong<sup>†</sup>, Teuta Boci<sup>§</sup>, Jiangping Deng<sup>§</sup>, Mahmood Ghassemi<sup>§</sup>, James L. Cook<sup>§</sup>, and Michael E. Johnson<sup>†\*</sup>

<sup>†</sup>Center for Pharmaceutical Biotechnology, University of Illinois at Chicago, 900 S. Ashland Ave., Chicago, IL 60607-7173 (USA)

<sup>§</sup>Department of Medicine, University of Illinois College of Medicine, 808 S. Wood St., Chicago, IL 60612

\*To whom correspondence should be addressed. Phone: 312-996-9114. Fax: 312-413-9303. E-mail: mjohnson@uic.edu

<sup>‡</sup>These authors contributed equally to the work presented herein.

## Contents

|                                                                  |      |
|------------------------------------------------------------------|------|
| 1. ROCS/EON Validation Results: Diphenyl Class .....             | S-3  |
| 2. ROCS/EON Validation Results: Indole Class .....               | S-5  |
| 3. ROCS/EON Validation Results: Amide Class .....                | S-6  |
| 4. ROCS/EON Validation Results: Imidazole Class .....            | S-7  |
| 5. Diphenyl Actives .....                                        | S-8  |
| 6. Indole Actives .....                                          | S-9  |
| 7. Amide Actives .....                                           | S-11 |
| 8. Imidazole Actives .....                                       | S-12 |
| 9. Diphenyl Decoys .....                                         | S-14 |
| 10. Indole Decoys .....                                          | S-14 |
| 11. Amide Decoys .....                                           | S-14 |
| 12. Imidazole Decoys .....                                       | S-14 |
| 13. Diphenyl Virtual Screen, Compounds Ordered and Tested .....  | S-15 |
| 14. Indole Virtual Screen, Compounds Ordered and Tested .....    | S-16 |
| 15. Amide Virtual Screen, Compounds Ordered and Tested .....     | S-17 |
| 16. Imidazole Virtual Screen, Compounds Ordered and Tested ..... | S-18 |
| 17. NMR Spectra for Published Compounds .....                    | S-19 |
| 18. HPLC Analysis of Published Compounds .....                   | S-34 |

## Tables in Supporting Information

|                                                                                                   |    |
|---------------------------------------------------------------------------------------------------|----|
| Table S1. Diphenyl class validation: ROCS (Shape-only)/EON query combinations .....               | S4 |
| Table S2. Diphenyl class validation: ROCS plus pharmacophore features without EON refinement..... | S4 |
| Table S3. Indole class validation: ROCS (Shape-only)/EON query combinations.....                  | S5 |
| Table S4. Indole class validation: ROCS plus pharmacophore features without EON refinement .....  | S5 |
| Table S5. Amide class validation: ROCS (Shape-only)/EON query combinations .....                  | S6 |
| Table S6. Amide class validation: ROCS plus pharmacophore features without EON refinement.....    | S6 |
| Table S7. Imidazole class validation: ROCS (Shape-only)/EON query combinations .....              | S7 |
| Table S8. Imidazole class validation: ROCS (Shape-only)/EON query combinations .....              | S7 |

## 1. ROCS/EON Validation Results: Diphenyl Class

**Table S1. Diphenyl class validation: ROCS (Shape-only)/EON query combinations**

| EON(#n)+ ROCS  | EF 1% | EON(#n)+ ROCS         | EF 1%        |
|----------------|-------|-----------------------|--------------|
| #1+B EON_input | 46.45 | <b>#1+C EON_input</b> | <b>46.45</b> |
| #2+B EON_input | 46.45 | #2+C EON_input        | 46.45        |
| #3+B EON_input | 46.45 | #3+C EON_input        | 46.45        |
| #4+B EON_input | 46.45 | #4+C EON_input        | 46.45        |
| #5+B EON_input | 46.45 | #5+C EON_input        | 46.45        |

Left: Diphenyl class ROCS (B) #1 +#2 (Shape-only) query combines with EON queries (#n / n=1~5)

Right: Diphenyl class ROCS (C) #1 +#2+#3 (Shape-only) query combines with EON queries (#n / n=1~5)

All the ROCS (Shape-only) /EON query combination listed in table 1 show perfect results. Therefore, we eventually choose “#1+C EON\_input” combination, the bold one in the right side of table 1, for the following ASDI production run, because ROCS (C) #1 +#2+#3 (Shape-only) query contains a larger shape than ROCS (B) #1 +#2 (Shape-only) query and #1 EON query contains the highest activity among all the other EON queries.

**Table S2. Diphenyl class validation: ROCS plus pharmacophore features without EON refinement**

| Diphenyl ROCS plus pharmacophore feature query | AUC | EF1%  |
|------------------------------------------------|-----|-------|
| Diphenyl_ROCS_pharmacophore_1                  | 1   | 46.45 |
| Diphenyl_ROCS_pharmacophore_1+2                | 1   | 46.45 |
| Diphenyl_ROCS_pharmacophore_1+2+3              | 1   | 46.45 |
| Diphenyl_ROCS_pharmacophore_1+2+3+4            | 1   | 46.45 |
| Diphenyl_ROCS_pharmacophore_1+2+3+4+5          | 1   | 46.45 |

## 2. ROCS/EON Validation Results: Indole Class

**Table S3. Indole class validation: ROCS (Shape-only)/EON query combinations**

| EON(#n)+ ROCS  | EF 1% | EON(#n)+ ROCS         | EF 1%     |
|----------------|-------|-----------------------|-----------|
| #1+C EON_input | 0     | <b>#1+D EON_input</b> | <b>51</b> |
| #2+C EON_input | 0     | #2+D EON_input        | 51        |
| #3+C EON_input | 0     | #3+D EON_input        | 51        |
| #4+C EON_input | 0     | #4+D EON_input        | 51        |
| #5+C EON_input | 0     | #5+D EON_input        | 51        |

Left: Indole class ROCS (C) #1 + #2 + #3 (Shape-only) query combines with EON queries (#n / n=1~5).

Right: Indole class ROCS (D) #1 + #2 + #3 + #4 (Shape-only) query combines with EON queries (#n / n=1~5) .

All the ROCS (Shape-only) /EON query combination listed in the right part of table 3 show perfect results. Therefore, we eventually choose “#1+D EON\_input” combination, the bold one in the right side of table 1, for the following ASDI production run, because #1 EON query contains the highest activity among all the other EON queries.

**Table S4. Indole class validation: ROCS plus pharmacophore features without EON refinement**

| Indole ROCS plus pharmacophore feature query | AUC   | EF1% |
|----------------------------------------------|-------|------|
| Indole_ROCS_pharmacophore_1                  | 0.994 | 51   |
| Indole_ROCS_pharmacophore_1+2                | 0.994 | 51   |
| Indole_ROCS_pharmacophore_1+2+3              | 0.994 | 51   |
| Indole_ROCS_pharmacophore_1+2+3+4            | 1     | 51   |
| Indole_ROCS_pharmacophore_1+2+3+4+5          | *     | *    |

\* “Indole\_ROCS\_pharmacophore\_1+2+3+4+5” query is the same as “Indole\_ROCS\_pharmacophore\_1+2+3+4” query, so we did not perform Indole\_ROCS\_pharmacophore\_1+2+3+4+5 validation run.

### 3. ROCS/EON Validation Results: Amide Class

**Table S5. Amide class validation: ROCS (Shape-only)/EON query combinations**

| EON(#n)+ ROCS         | EF 1%        | EON(#n)+ ROCS  | EF 1% |
|-----------------------|--------------|----------------|-------|
| #1+C EON_input        | 14.67        | #1+D EON_input | 11    |
| <b>#2+C EON_input</b> | <b>18.33</b> | #2+D EON_input | 11    |
| #3+C EON_input        | 14.67        | #3+D EON_input | 14.67 |
| #4+C EON_input        | 11           | #4+D EON_input | 11    |
| #5+C EON_input        | 18.33        | #5+D EON_input | 11    |

Left: Amide class ROCS (C) #1+#2+#3 (Shape-only) query combines with EON queries (#n / n=1~5)

Right: Amide class ROCS (D) #1+#2+#3+#4 (Shape-only) query combines with EON queries (#n / n=1~5)

Both #2+C and #5+C in the left side of table 4 are the best ROCS (Shape-only) /EON query combinations for the amide class. Therefore, we eventually choose “#2+C EON\_input” combination for the following ASDI production run because #2 amide EON query contains a higher activity than #5 amide EON query.

**Table S6. Amide class validation: ROCS plus pharmacophore features without EON refinement**

| Amide ROCS plus pharmacophore feature query | AUC   | EF1% |
|---------------------------------------------|-------|------|
| Amide_ROCS_pharmacophore_1                  | 0.987 | 22   |
| Amide_ROCS_pharmacophore_1+2                | 0.985 | 22   |
| Amide_ROCS_pharmacophore_1+2+3              | 0.992 | 22   |
| Amide_ROCS_pharmacophore_1+2+3+4            | 0.992 | 22   |
| Amide_ROCS_pharmacophore_1+2+3+4+5          | 0.943 | 22   |

## 4. ROCS/EON Validation Results: Imidazole Class

**Table S7. Imidazole class validation: ROCS (Shape-only)/EON query combinations**

| EON(#n)+ ROCS         | EF 1%        | EON(#n)+ ROCS  | EF 1% |
|-----------------------|--------------|----------------|-------|
| #1+A EON_input        | 47.82        | #1+B EON_input | 11.96 |
| #2+A EON_input        | 47.82        | #2+B EON_input | 11.96 |
| #3+A EON_input        | 47.82        | #3+B EON_input | 11.96 |
| #4+A EON_input        | 59.78        | #4+B EON_input | 11.96 |
| <b>#5+A EON_input</b> | <b>59.78</b> | #5+B EON_input | 11.96 |

Left: Imidazole class ROCS (A) #1 (Shape-only) query combines with EON queries (#n / n=1~5)

Right: Imidazole class ROCS (B) #1 + #2 (Shape-only) query combines with EON queries (#n / n=1~5)

Both #4+A and #5+A in the left side of table 4 are the best ROCS (Shape-only) /EON query combinations for the imidazole class. However, #5+A shows a better performance in the enrichment factor at 2% (data not shown) and the activity of imidazole #4 and #5 EON query is not significantly different ( $IC_{50}$  to *E.coli* are 1.2  $\mu$ M and 1.9  $\mu$ M respectively). Therefore, we eventually choose “#5+A EON\_input” combination for the following ASDI production run.

**Table S8. Imidazole class validation: ROCS (Shape-only)/EON query combinations**

| Imidazole ROCS plus pharmacophore feature query | AUC   | EF 1% |
|-------------------------------------------------|-------|-------|
| Imidazole_ROCS_pharmacophore_1                  | 1     | 59.78 |
| Imidazole_ROCS_pharmacophore_1+2                | *     | *     |
| Imidazole_ROCS_pharmacophore_1+2+3              | *     | *     |
| Imidazole_ROCS_pharmacophore_1+2+3+4            | *     | *     |
| Imidazole_ROCS_pharmacophore_1+2+3+4+5          | 0.379 | 0     |

## 5. Diphenyl Actives

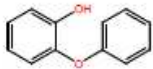

title: 10  
KI\_ECOLI\_NM: 500.0

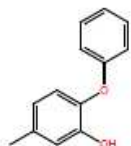

title: 13  
KI\_ECOLI\_NM: 7.2

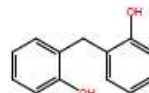

title: 15  
KI\_ECOLI\_NM: 53000.0

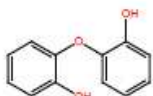

title: 14  
KI\_ECOLI\_NM: 150.0

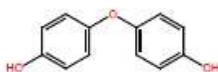

title: 16  
KI\_ECOLI\_NM: 1700000.0

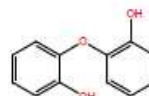

title: 2-hydroxydiphenylether1  
KI\_ECOLI\_NM: 500.0

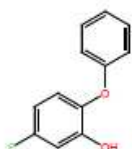

title: 12  
KI\_ECOLI\_NM: 3.2

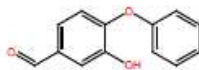

title: 5  
KI\_ECOLI\_NM: 620.0

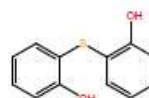

title: 2-hydroxydiphenylether2  
KI\_ECOLI\_NM: 16000.0

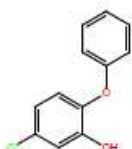

title: 11  
KI\_ECOLI\_NM: 0.001

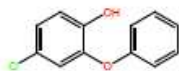

title: 2-hydroxydiphenylether3  
KI\_ECOLI\_NM: 2500.0

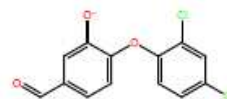

title: 1  
KI\_ECOLI\_NM: 1000.0

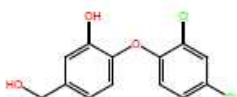

title: 4  
KI\_ECOLI\_NM: 1850.0

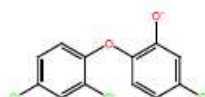

title: triclosan  
KI\_ECOLI\_NM: 0.007

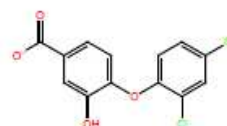

title: 2  
KI\_ECOLI\_NM: 1300.0

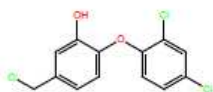

title: 3  
KI\_ECOLI\_NM: 2750.0



## 6. Indole Actives

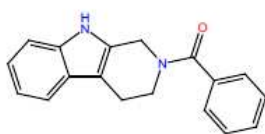

title: indole 5  
Enzymologic: IC50 nM 1: 2700

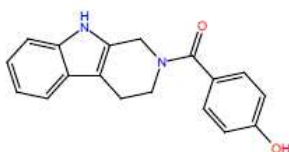

title: indole 6  
Enzymologic: IC50 nM 1: 18000

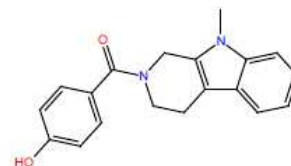

title: indole 7  
Enzymologic: IC50 nM 1: 11000

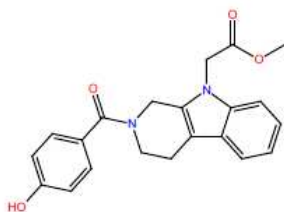

title: indole 8  
Enzymologic: IC50 nM 1: 34900

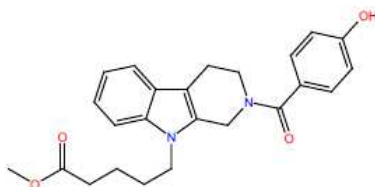

title: indole 9  
Enzymologic: IC50 nM 1: 26800

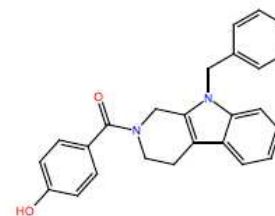

title: indole 10  
Enzymologic: IC50 nM 1: 27000

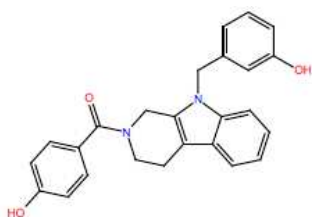

title: indole 11  
Enzymologic: IC50 nM 1: 8800

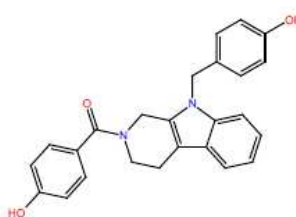

title: indole 3  
Enzymologic: IC50 nM 1: 4200

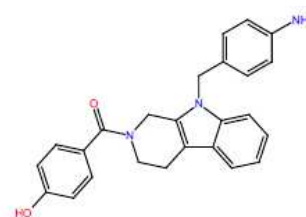

title: indole 12  
Enzymologic: IC50 nM 1: 21400

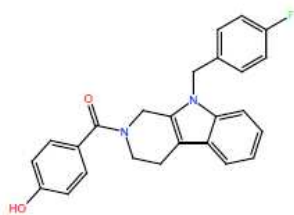

title: indole 13  
Enzymologic: IC50 nM 1: 4200

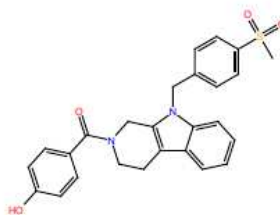

title: indole 14  
Enzymologic: IC50 nM 1: 4500

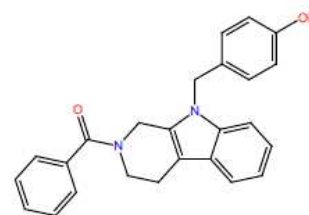

title: indole 19  
Enzymologic: IC50 nM 1: 2700

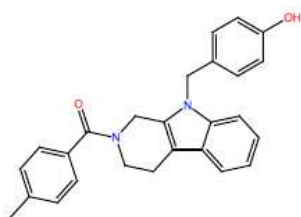

title: indole 20  
Enzymologic: IC50 nM 1: 5200

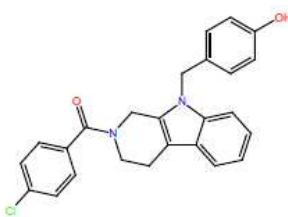

title: indole 22  
Enzymologic: IC50 nM 1: 16800

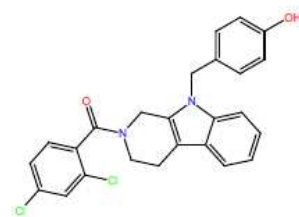

title: indole 23  
Enzymologic: IC50 nM 1: 35800

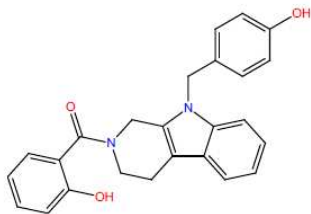

title: indole 27  
Enzymologic: IC50 nM 1: 4300

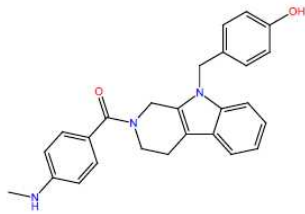

title: indole 26  
Enzymologic: IC50 nM 1: 38600

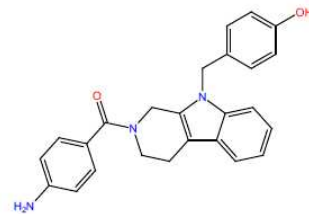

title: indole 25  
Enzymologic: IC50 nM 1: 4000

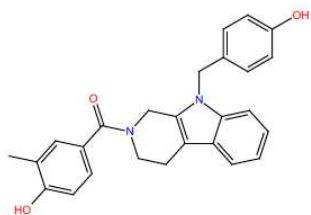

title: indole 32  
Enzymologic: IC50 nM 1: 4400

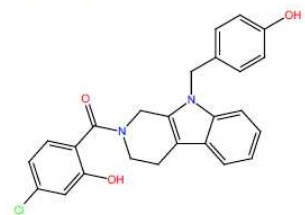

title: indole 31  
Enzymologic: IC50 nM 1: 6100

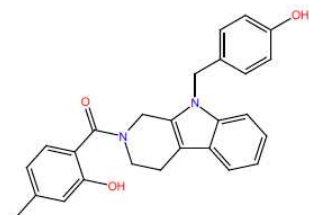

title: indole 30  
Enzymologic: IC50 nM 1: 8200

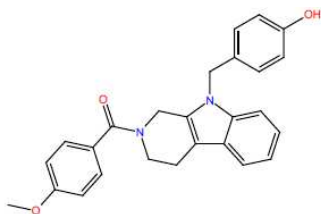

title: indole 29  
Enzymologic: IC50 nM 1: 35500

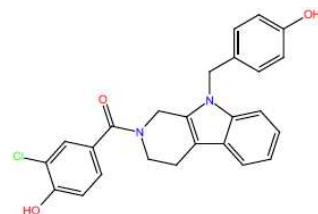

title: indole 33  
Enzymologic: IC50 nM 1: 3400

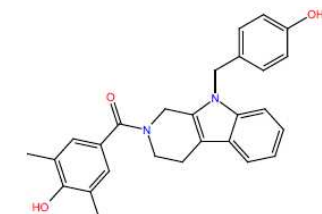

title: indole 35  
Enzymologic: IC50 nM 1: 23000

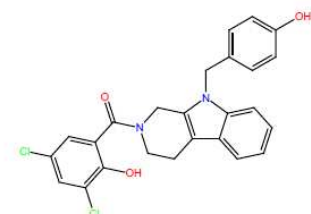

title: indole 34  
Enzymologic: IC50 nM 1: 9900

## 7. Amide Actives

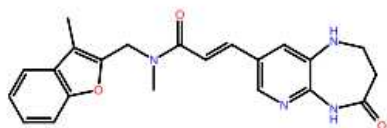

title: pyridodiazepine11d  
IC50\_SAUREUS\_NM: 7

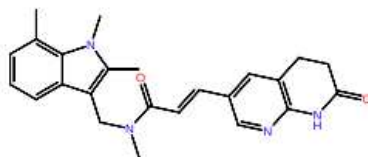

title: INDOLENAPHTHYRIDINONE32  
IC50\_SAUREUS\_NM: 20

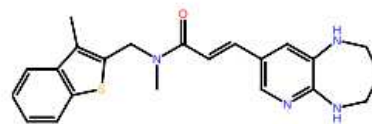

title: pyridodiazepine9a  
IC50\_SAUREUS\_NM: 26

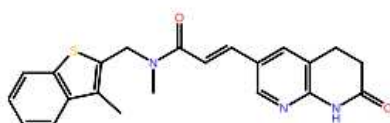

title: pyridodiazepine1  
IC50\_SAUREUS\_NM: 30

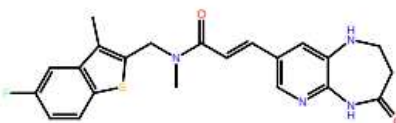

title: pyridodiazepine11a  
IC50\_SAUREUS\_NM: 31

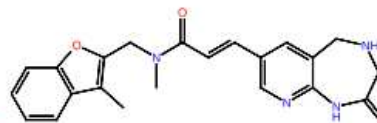

title: pyridodiazepine18  
IC50\_SAUREUS\_NM: 43

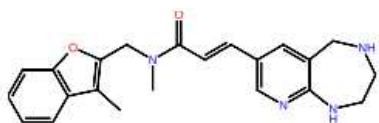

title: pyridodiazepine20b  
IC50\_SAUREUS\_NM: 48

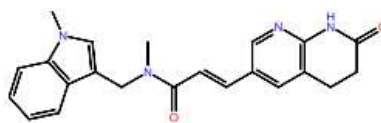

title: 1MFP\_ECOLI\_NAD\_SB611113\_2.33A  
IC50\_SAUREUS\_NM: 50

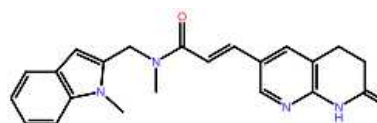

title: INDOLE NAPHTHYRIDINONE 21  
IC50\_SAUREUS\_NM: 50

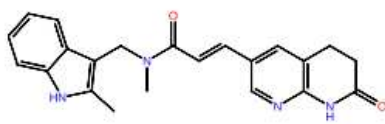

title: INDOLENAPHTHYRIDINONE30  
IC50\_SAUREUS\_NM: 50

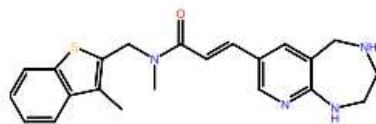

title: pyridodiazepine20a  
IC50\_SAUREUS\_NM: 57

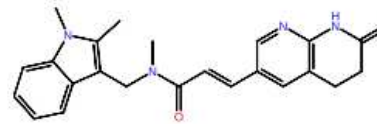

title: INDOLE NAPHTHYRIDINONE 31  
IC50\_SAUREUS\_NM: 60

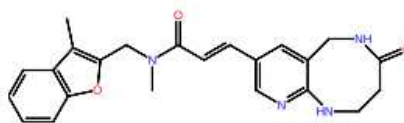

title: pyridodiazepine28  
IC50\_SAUREUS\_NM: 61

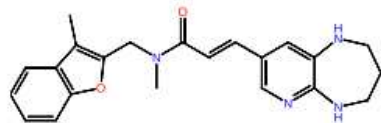

title: pyridodiazepine9b  
IC50\_SAUREUS\_NM: 67

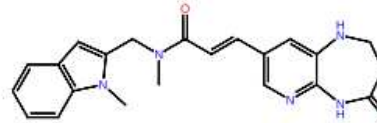

title: pyridodiazepine11b  
IC50\_SAUREUS\_NM: 130

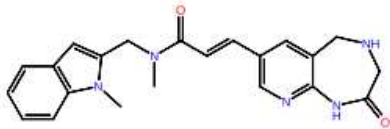

title: pyridodiazepine16c  
IC50\_SAUREUS\_NM: 130

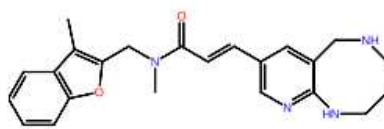

title: pyridodiazepine31  
IC50\_SAUREUS\_NM: 170

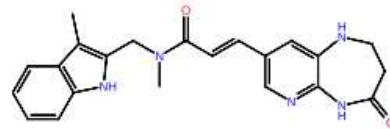

title: pyridodiazepine11c  
IC50\_SAUREUS\_NM: 200

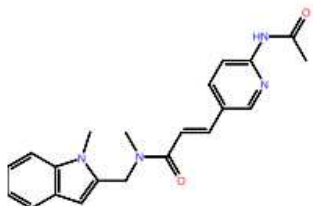

title: ACETAMIDO DERIV. 12  
IC50\_SAUREUS\_NM: 300

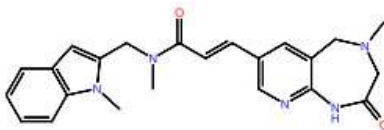

title: pyridodiazepin16a  
IC50\_SAUREUS\_NM: 510

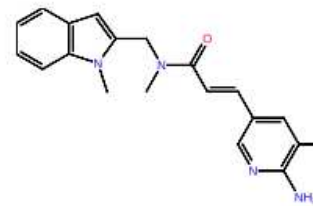

title: AMINOPYRIDINE 5  
IC50\_SAUREUS\_NM: 910

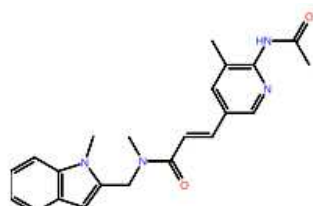

title: ACETAMIDODERIV.13  
IC50\_SAUREUS\_NM: 940

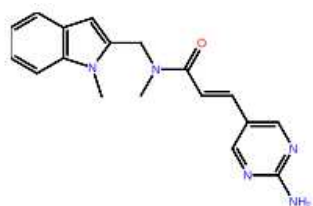

title: AMINOPYRIMIDINE DERIV. 10  
IC50\_SAUREUS\_NM: 2200

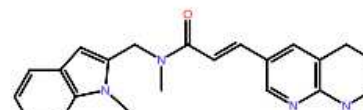

title: PIPERIDINE 11  
IC50\_SAUREUS\_NM: 2300

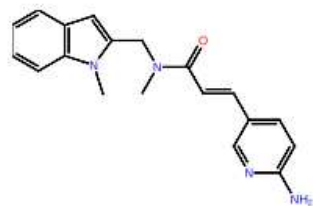

title: AMINOPYRIDINEDERIV.9  
IC50\_SAUREUS\_NM: 2400

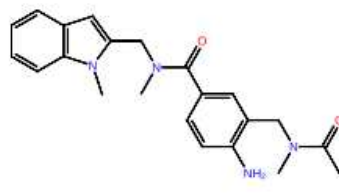

title: 1LX6\_Ecoli\_NAD\_Benzamide\_2.40A  
IC50\_SAUREUS\_NM: 6700

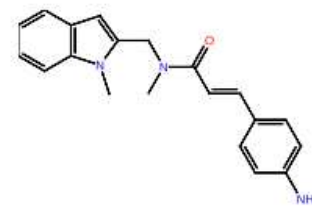

title: ACRYLAMIDE DERIV. 13  
IC50\_SAUREUS\_NM: 11200

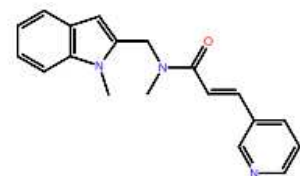

title: AMINOPYRIDINEDERIV.14  
IC50\_SAUREUS\_NM: 14200

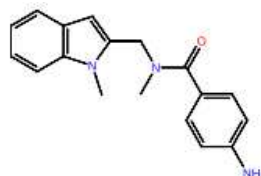

title: BENZAMIDEDERIV.7  
IC50\_SAUREUS\_NM: 16300

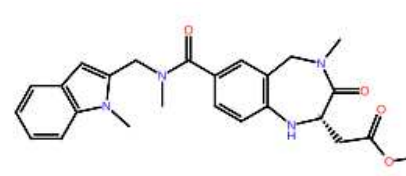

title: 1,4-BENZODIAZEPINEDERIV.3  
IC50\_SAUREUS\_NM: 16500

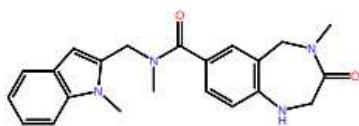

title: 1,4-BENZODIAZEPINEDERIV.4  
IC50\_SAUREUS\_NM: 21200

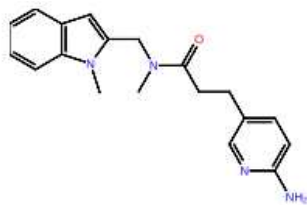

title: AMINOPYRIDINEDERIV.11  
IC50\_SAUREUS\_NM: 93700

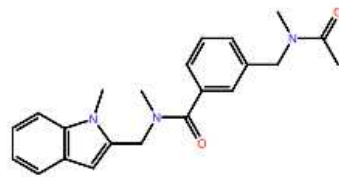

title: BENZAMIDEDERIV.6  
IC50\_SAUREUS\_NM: 107000

## 8. Imidazole Actives

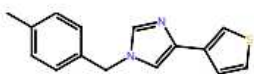

title: DISUBSTITUTEDIMIDAZOLE23  
E\_COLI\_IC50\_NM: 250

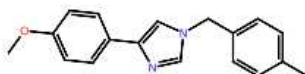

title: DISUBSTITUTEDIMIDAZOLE4  
E\_COLI\_IC50\_NM: 360

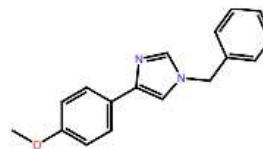

title: DISUBSTITUTEDIMIDAZOLE28  
E\_COLI\_IC50\_NM: 1130

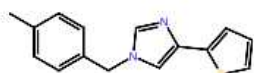

title: 1I2Z\_Ecoli\_NAD\_BRL12654\_2.80A  
E\_COLI\_IC50\_NM: 1240

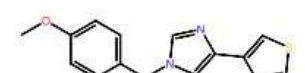

title: DISUBSTITUTEDIMIDAZOLE21  
E\_COLI\_IC50\_NM: 1900

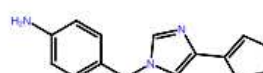

title: DISUBSTITUTED IMIDAZOLE 20  
E\_COLI\_IC50\_NM: 2030

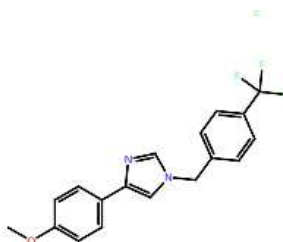

title: DISUBSTITUTEDIMIDAZOLE29  
E\_COLI\_IC50\_NM: 4070

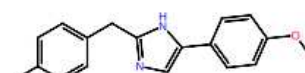

title: DISUBSTITUTEDIMIDAZOLE11  
E\_COLI\_IC50\_NM: 6620

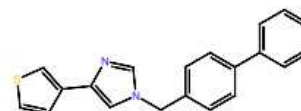

title: DISUBSTITUTEDIMIDAZOLE27  
E\_COLI\_IC50\_NM: 7660

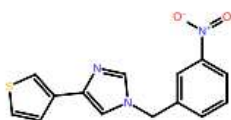

title: DISUBSTITUTEDIMIDAZOLE8  
E\_COLI\_IC50\_NM: 14700

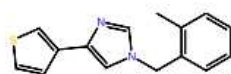

title: DISUBSTITUTEDIMIDAZOLE26  
E\_COLI\_IC50\_NM: 36500

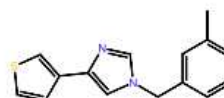

title: DISUBSTITUTEDIMIDAZOLE25  
E\_COLI\_IC50\_NM: 42400

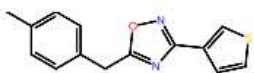

title: OXADIAZOLE33  
E\_COLI\_IC50\_NM: 50700

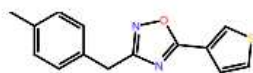

title: OXADIAZOLE 19  
E\_COLI\_IC50\_NM: 51000

## **9. Diphenyl Decoys**

See separately attached .sdf file entitled "FabI\_Diphenyl\_Decoys\_500.sdf"

## **10. Indole Decoys**

See Separately attached .sdf file entitled "FabI\_Indole\_Decoys\_1000.sdf"

## **11. Amide Decoys**

See separately attached .sdf file entitled "FabI\_Amide\_Decoys\_533.sdf"

## **12. Imidazole Decoys**

See separately attached .sdf file entitled "FabI\_Imidazole\_Decoys\_529.sdf"



### 13. Diphenyl Virtual Screen, Compounds Ordered and Tested

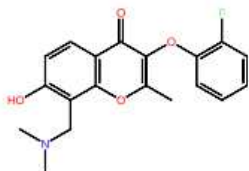

title: 250003954  
Inhibition %25: 85% @ 100uM (55% @ 40uM)

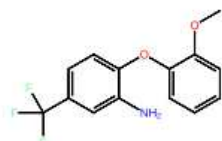

title: 650000242  
Inhibition %25: 18% @ 100uM (3% @ 40uM)

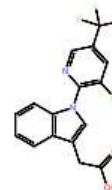

title: 600003523  
Inhibition %25: 17% @ 100uM (6% @ 40uM)

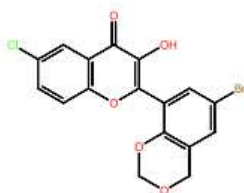

title: 100038212  
Inhibition %25: 14% @ 100uM (0% @ 40uM)

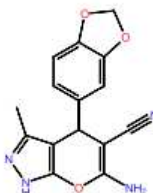

title: 150012092  
Inhibition %25: 14% @ 100uM (0% @ 40uM)

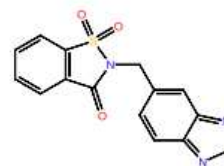

title: 650005614  
Inhibition %25: 13% @ 100uM (5% @ 40uM)

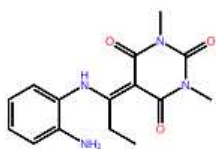

title: 800000443  
Inhibition %25: 12% @ 100uM (14% @ 40uM)

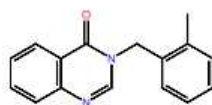

title: 600004374  
Inhibition %25: 10% @ 100uM (0% @ 40uM)

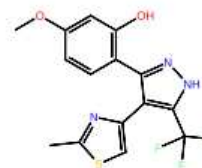

title: 100084666  
Inhibition %25: 9% @ 100uM (6% @ 40uM)

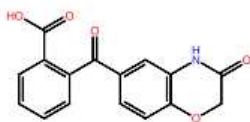

title: 600001343  
Inhibition %25: 8% @ 100uM (0% @ 40uM)

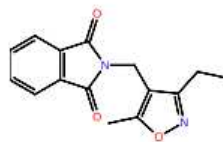

title: 100084635  
Inhibition %25: 3% @ 100uM (0% @ 40uM)

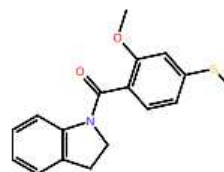

title: 450000131  
Inhibition %25: 1% @ 100uM (6% @ 40uM)

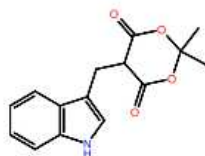

title: 100026264  
Inhibition %25: 0% @ 100uM (0% @ 40uM)

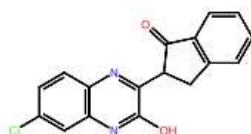

title: 100072943  
Inhibition %25: 0% @ 100uM (0% @ 40uM)



## 14. Indole Virtual Screen, Compounds Ordered and Tested

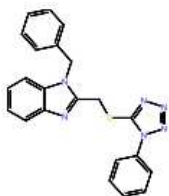

title: 600009538  
Inhibition %25: 68% @ 100uM (42% @ 40uM)

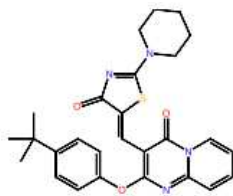

title: 950017010  
Inhibition %25: 57% @ 100uM (0% @ 40uM)

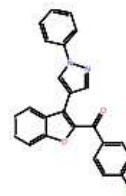

title: 600005310  
Inhibition %25: 24% @ 100uM (26% @ 40uM)

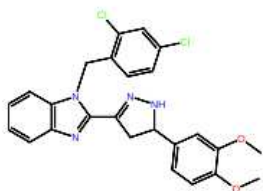

title: 100034909  
Inhibition %25: 22% @ 100uM (25% @ 40uM)

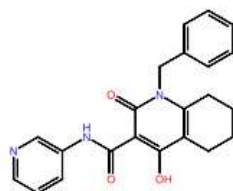

title: 800003371  
Inhibition %25: 21% @ 100uM (10% @ 40uM)

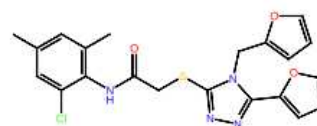

title: 900087852  
Inhibition %25: 21% @ 100uM (8% @ 40uM)

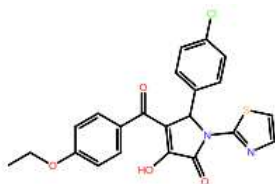

title: 250002111  
Inhibition %25: 18% @ 100uM (7% @ 40uM)

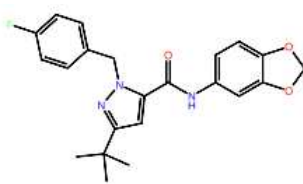

title: 650002560  
Inhibition %25: 11% @ 100uM (0% @ 40uM)

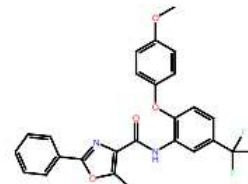

title: 650002232  
Inhibition %25: 7% @ 100uM (0% @ 40uM)

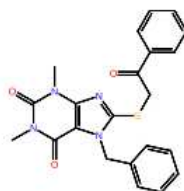

title: 100047760  
Inhibition %25: 3% @ 100uM (12% @ 40uM)

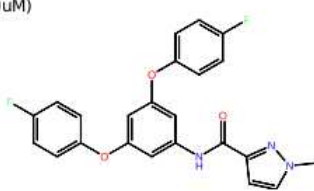

title: 600008452  
Inhibition %25: 3% @ 100uM (0% @ 40uM)

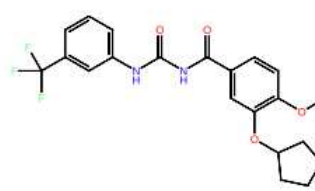

title: 650006798  
Inhibition %25: 2% @ 100uM (0% @ 40uM)

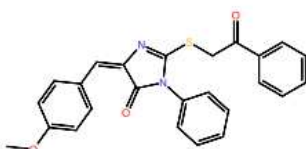

title: 100039560  
Inhibition %25: 0% @ 100uM (17% @ 40uM)

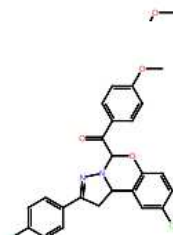

title: 100040675  
Inhibition %25: 0% @ 100uM (0% @ 40uM)

## 15. Amide Virtual Screen, Compounds Ordered and Tested

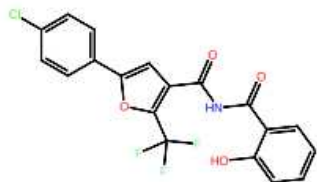

title: 650005744  
Inhibition %25: 39% @ 100uM (100% @ 40uM)

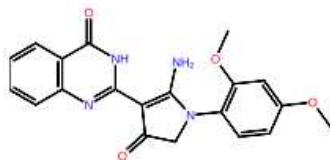

title: 250002532  
Inhibition %25: 23% @ 100uM (5% @ 40uM)

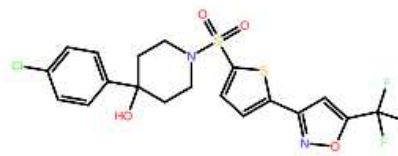

title: 650000871  
Inhibition %25: 17% @ 100uM (10% @ 40uM)

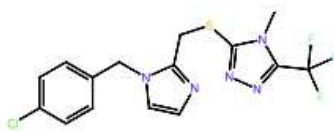

title: 650006663  
Inhibition %25: 13% @ 100uM (17% @ 40uM)

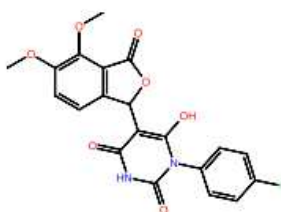

title: 800000798  
Inhibition %25: 6% @ 100uM (1% @ 40uM)

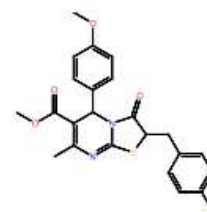

title: 100077132  
Inhibition %25: 3% @ 100uM (12% @ 40uM)

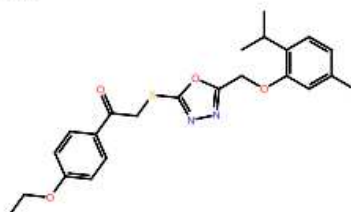

title: 100066729  
Inhibition %25: 0% @ 100uM (15% @ 40uM)

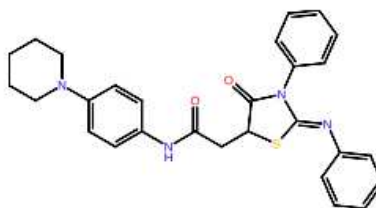

title: 100041600  
Inhibition %25: 0% @ 100uM (0% @ 40uM)

## 16. Imidazole Virtual Screen, Compounds Ordered and Tested

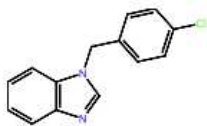

title: 100017167  
Inhibition %25: 70% @ 100uM (94% @ 40uM)

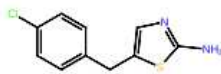

title: 100042025  
Inhibition %25: 49% @ 100uM (45% @ 40uM)

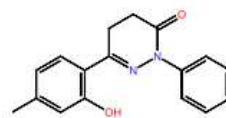

title: 100065143  
Inhibition %25: 31% @ 100uM (0% @ 40uM)

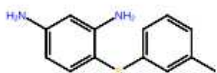

title: 100080858  
Inhibition %25: 22% @ 100uM (11% @ 40uM)

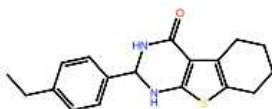

title: 400000213  
Inhibition %25: 22% @ 100uM (0% @ 40uM)

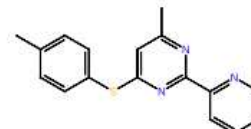

title: 650010595  
Inhibition %25: 18% @ 100uM (23% @ 40uM)

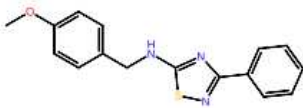

title: 650002962  
Inhibition %25: 18% @ 100uM (3% @ 40uM)

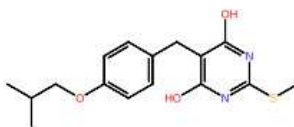

title: 600003750  
Inhibition %25: 15% @ 100uM (0% @ 40uM)

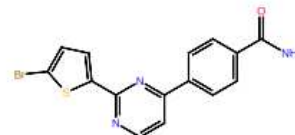

title: 650002630  
Inhibition %25: 10% @ 100uM (11% @ 40uM)

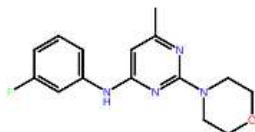

title: 800000418  
Inhibition %25: 10% @ 100uM (0% @ 40uM)

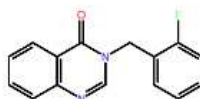

title: 100042452  
Inhibition %25: 4% @ 100uM (15% @ 40uM)

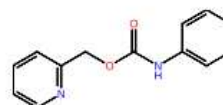

title: 600001518  
Inhibition %25: 3% @ 100uM (7% @ 40uM)

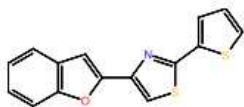

title: 650002616  
Inhibition %25: 2% @ 100uM (0% @ 40uM)

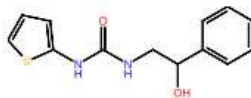

title: 650004123  
Inhibition %25: 2% @ 100uM (0% @ 40uM)

## 17. NMR Spectra for Published Compounds

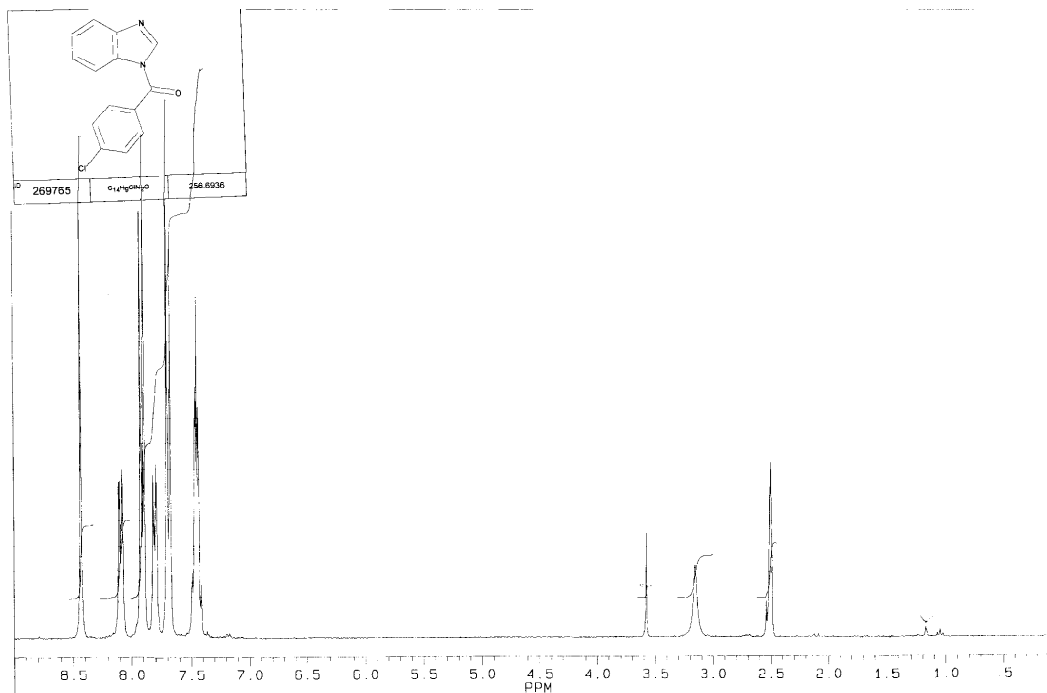

CB-5269765 NMR spectrum

571325B

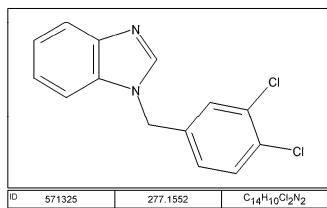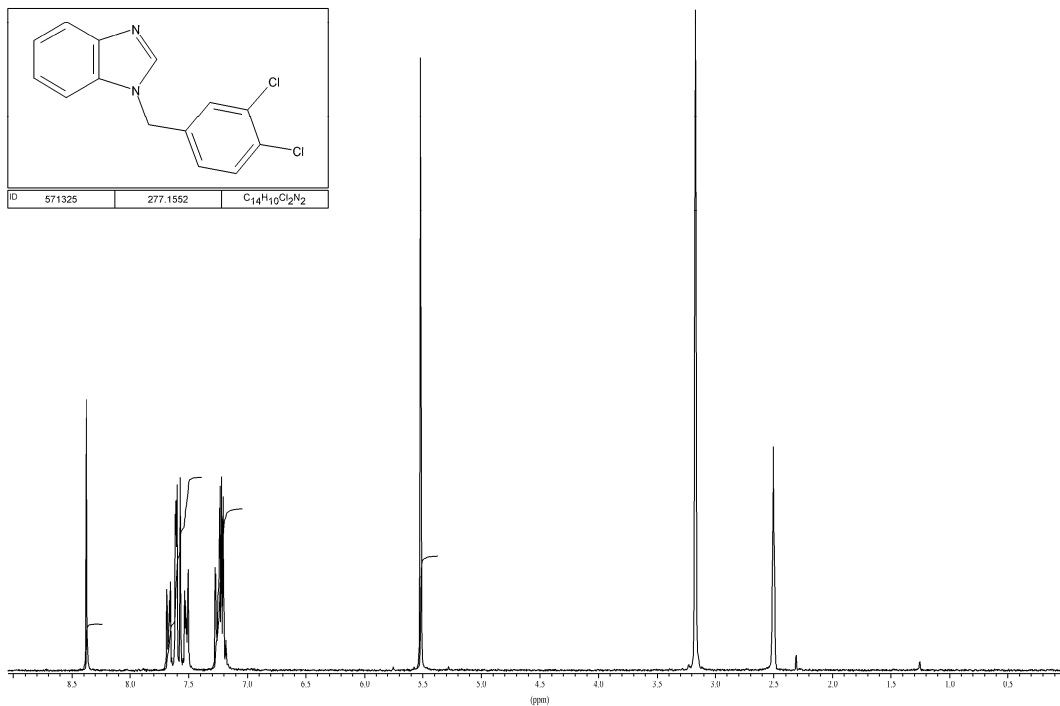

CB-5571325 NMR spectrum

b0173768

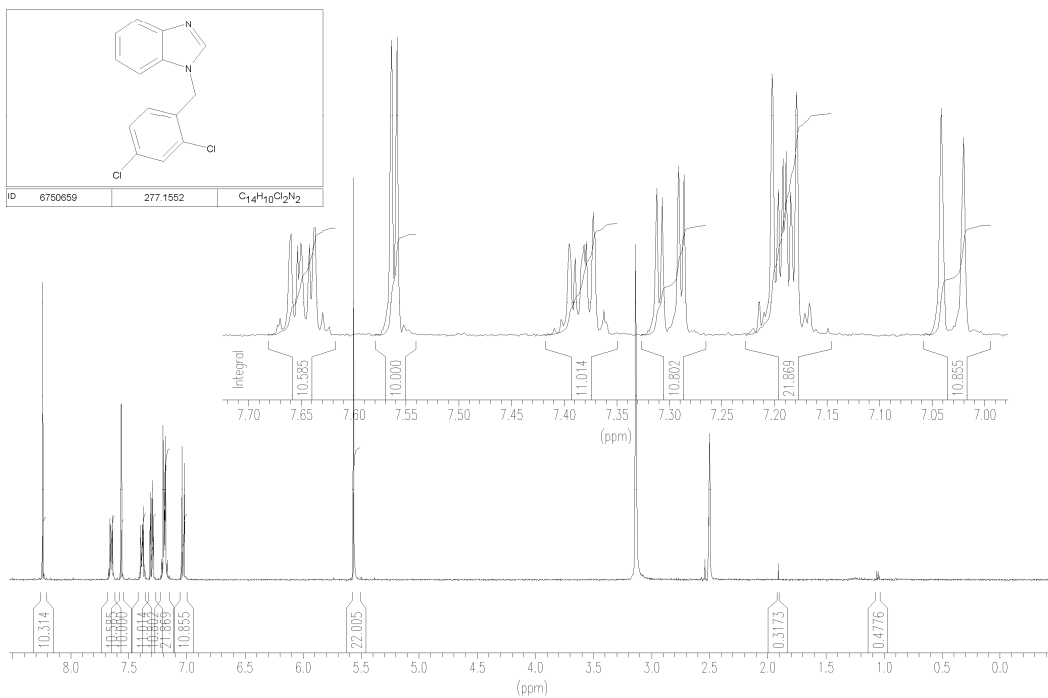

CB-6750659 NMR spectrum

b0331590

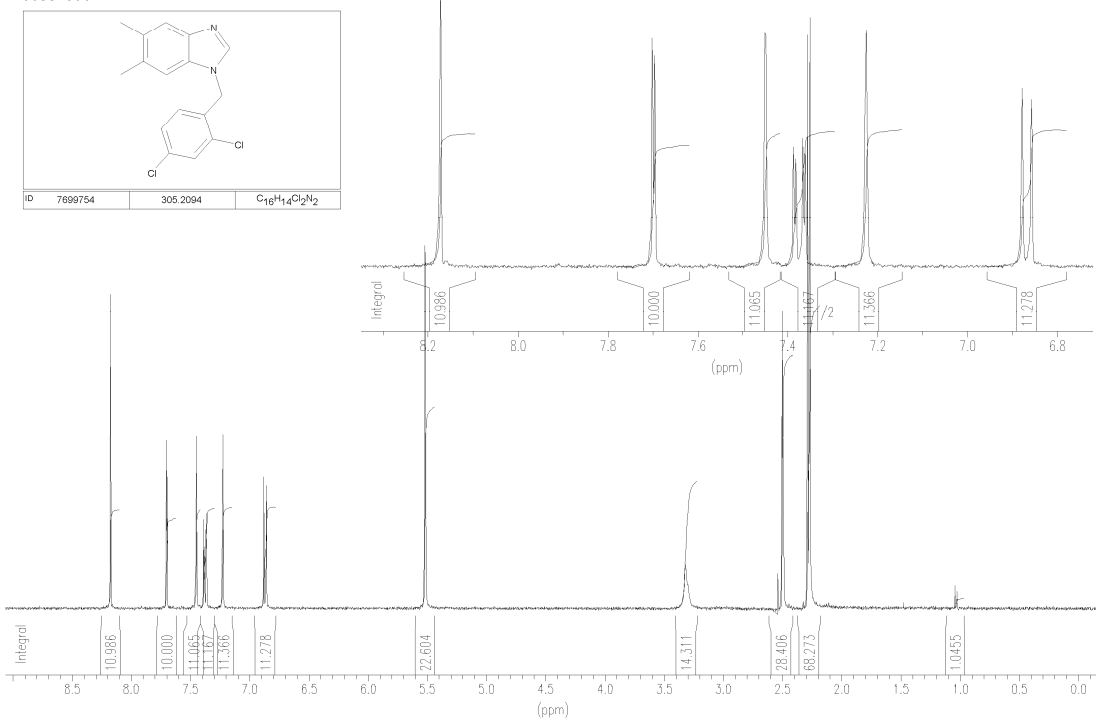

CB-7699754 NMR spectrum

B0490711 DMSO-D6/CCL4=2:1 Dsh

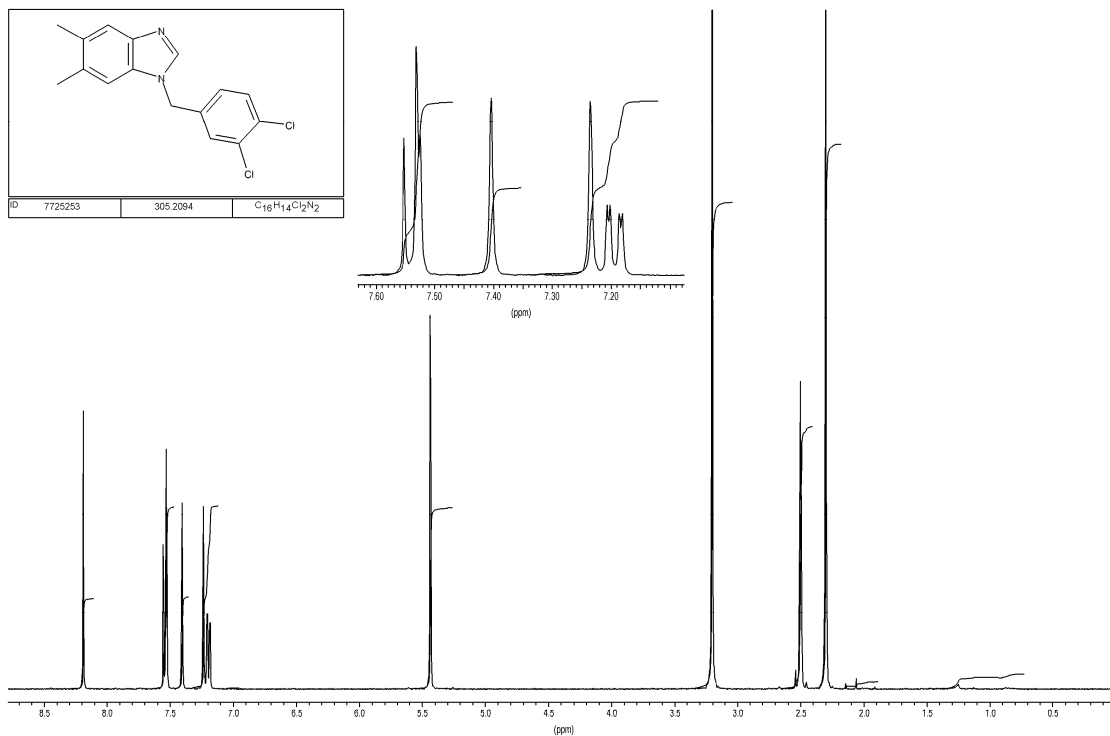

Cb-772532 NMR spectrum



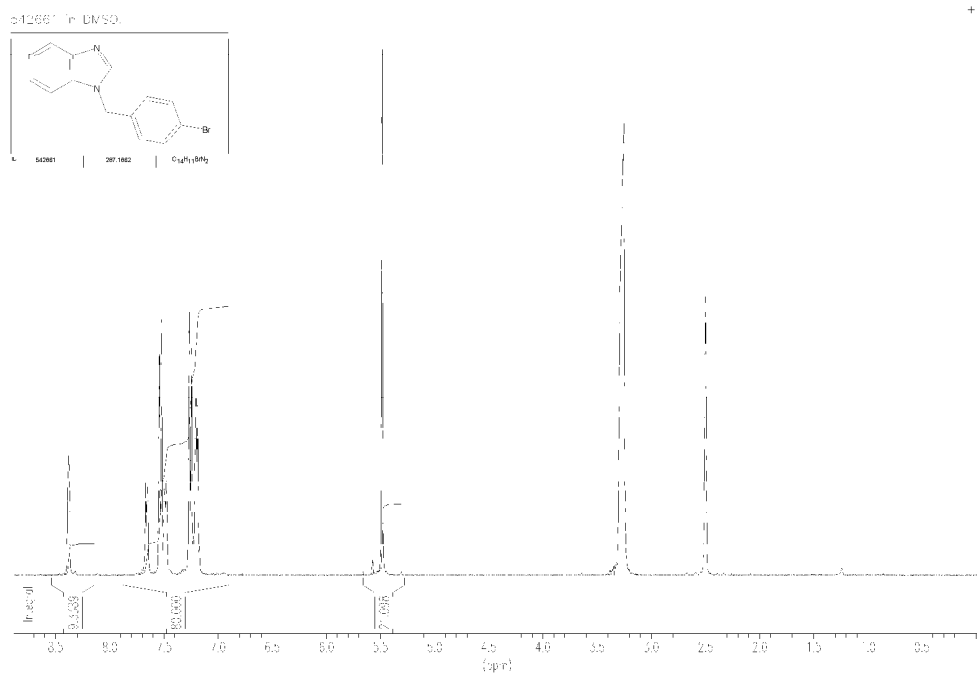

CB-5542661 NMR spectrum-1

542661B

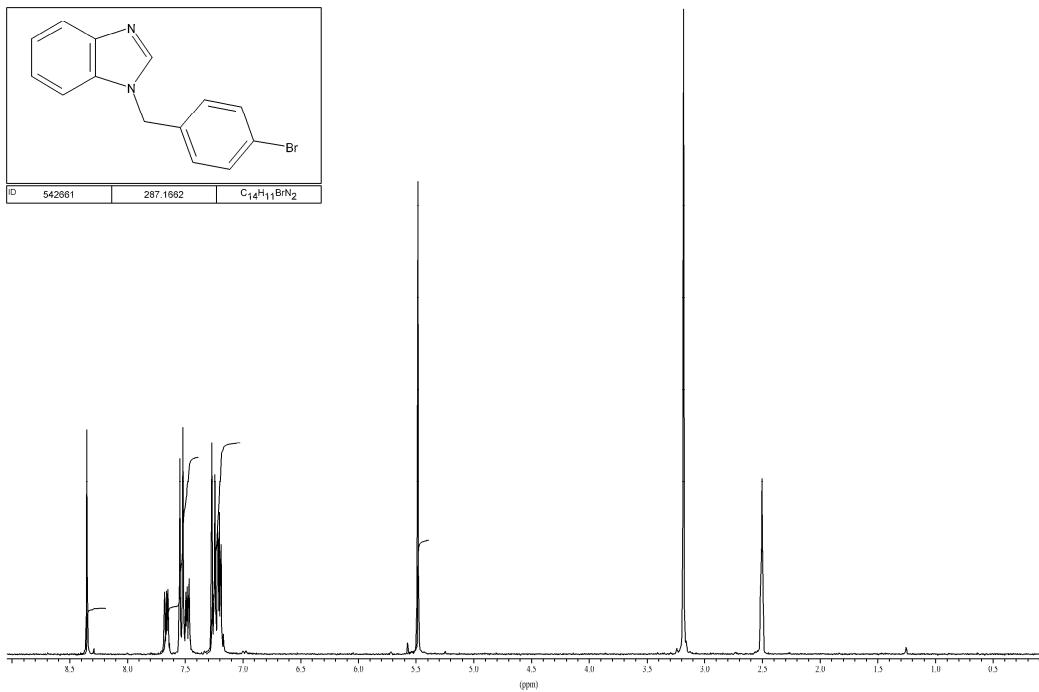

CB-5542661 NMR spectrum-2

b0247579

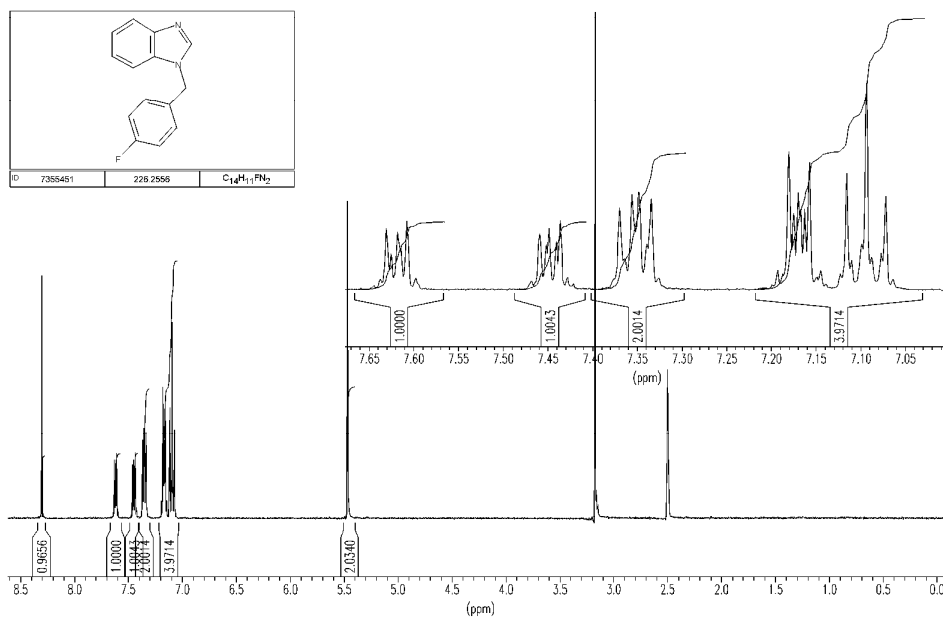

# CB-7355451 NMR spectrum

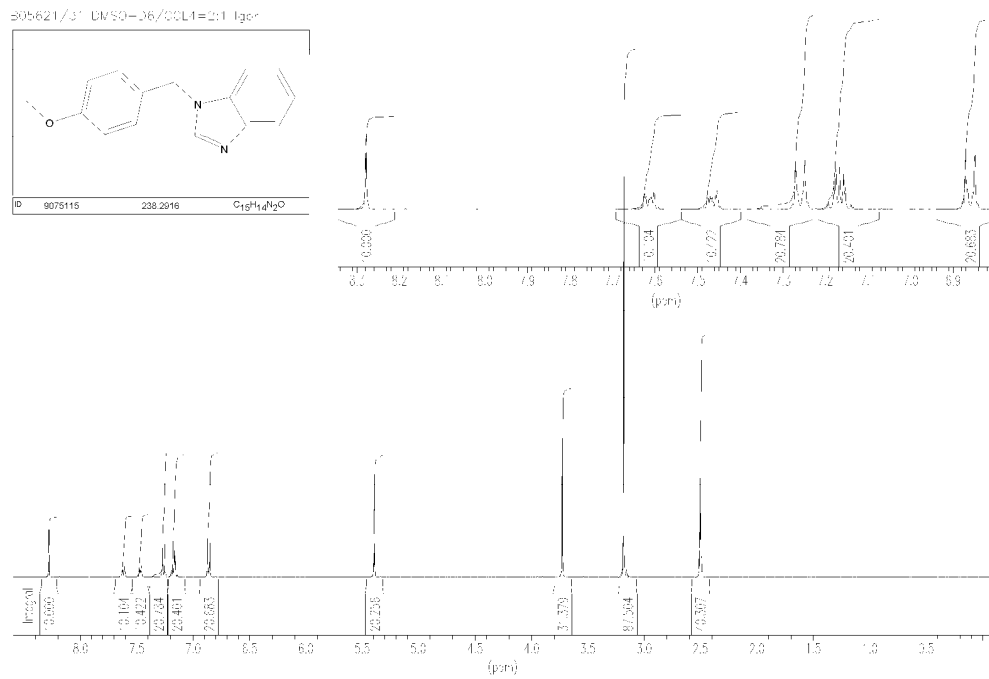

# CB-9075115 NMR spectrum

b0356403

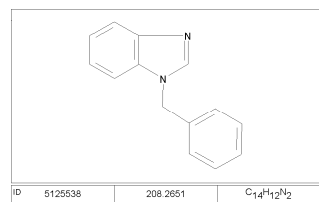

|    |         |          |                                                |
|----|---------|----------|------------------------------------------------|
| ID | 5125538 | 208.2651 | C <sub>14</sub> H <sub>12</sub> N <sub>2</sub> |
|----|---------|----------|------------------------------------------------|

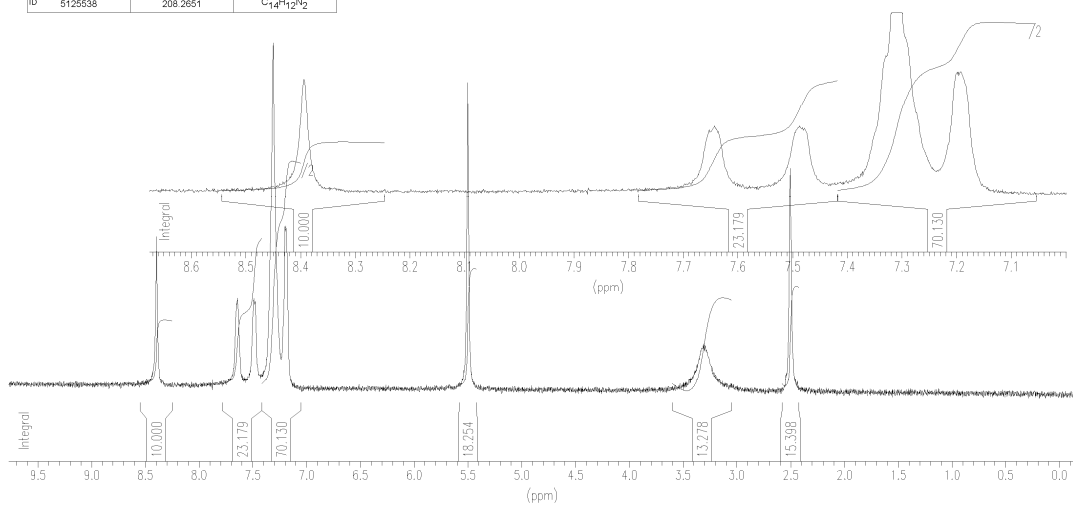

CB-5125538 NMR spectrum

660856-A

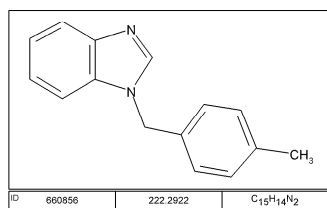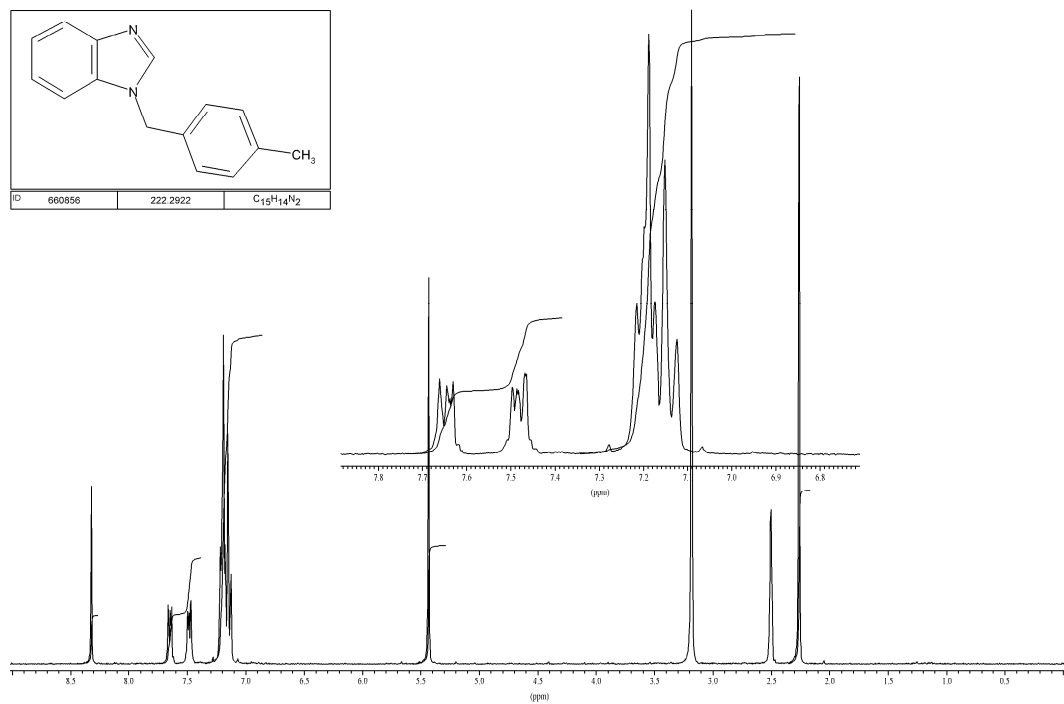

CB-5660856 NMR spectrum

B0488127 DMSO-D6/CCL4=2:1 Dsh

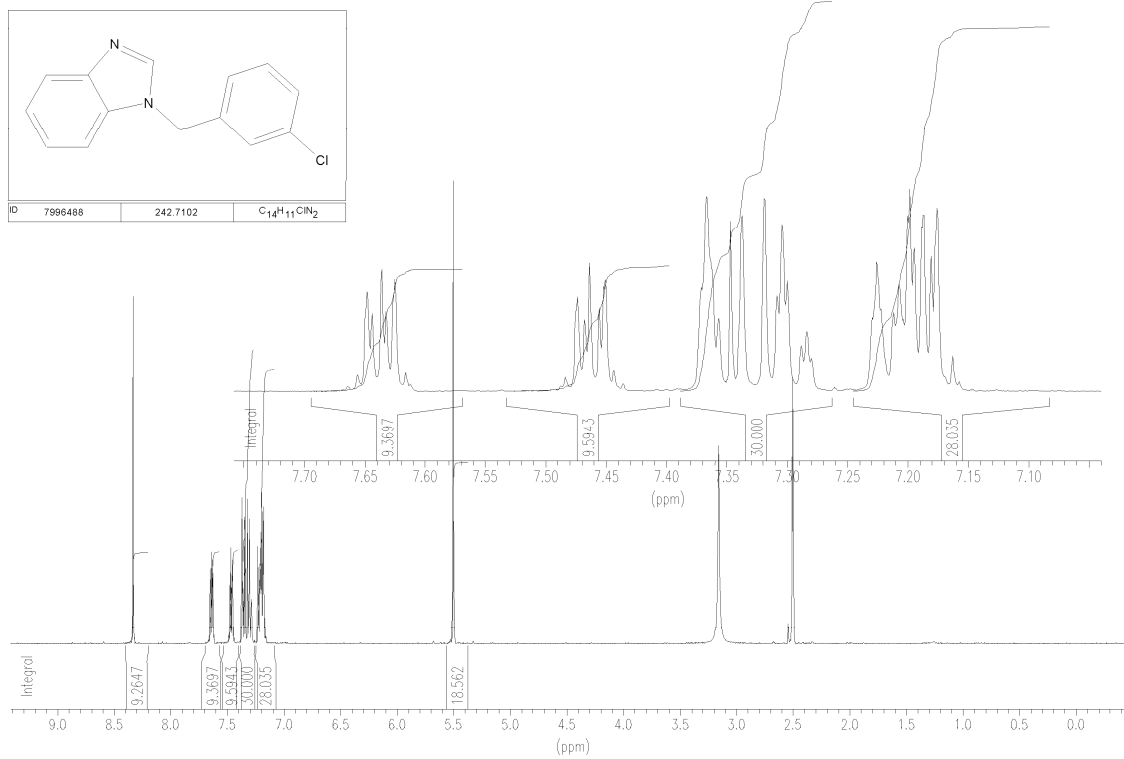

CB-7996488 NMR spectrum

/CHEM B0105983 □ Opr: KACHALA V.V.; SOLV: DMSO ;

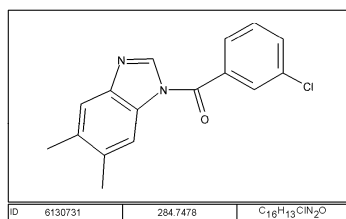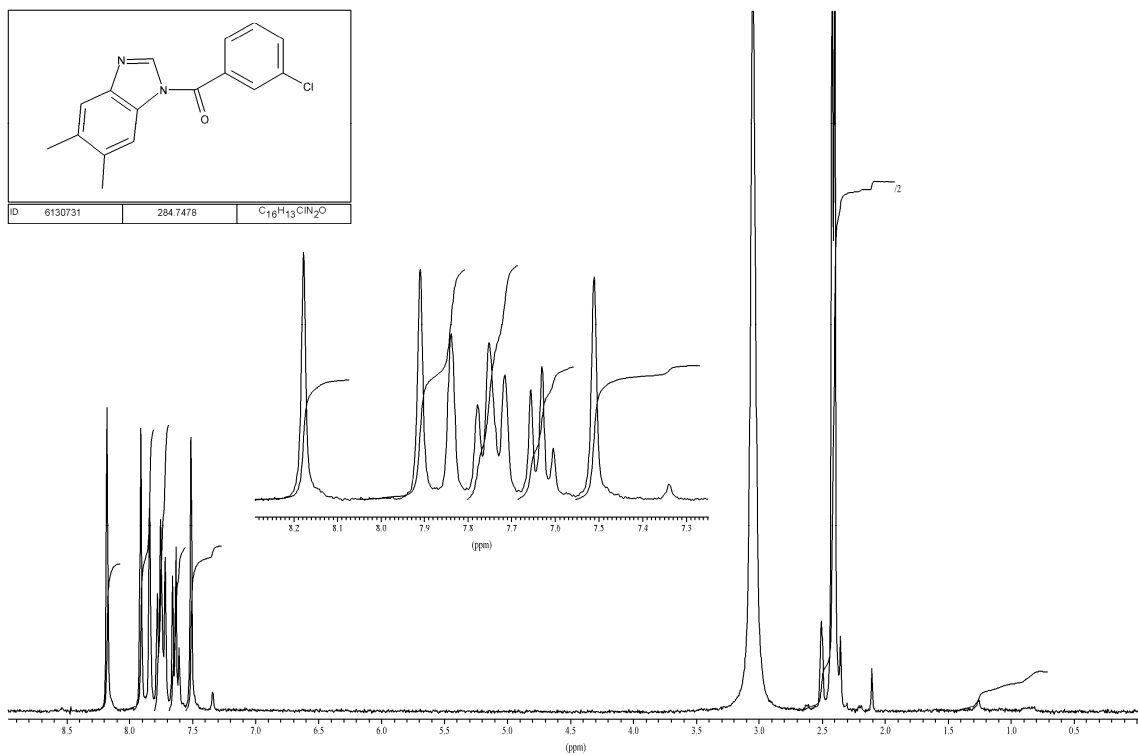

CB-6130731 NMR spectrum

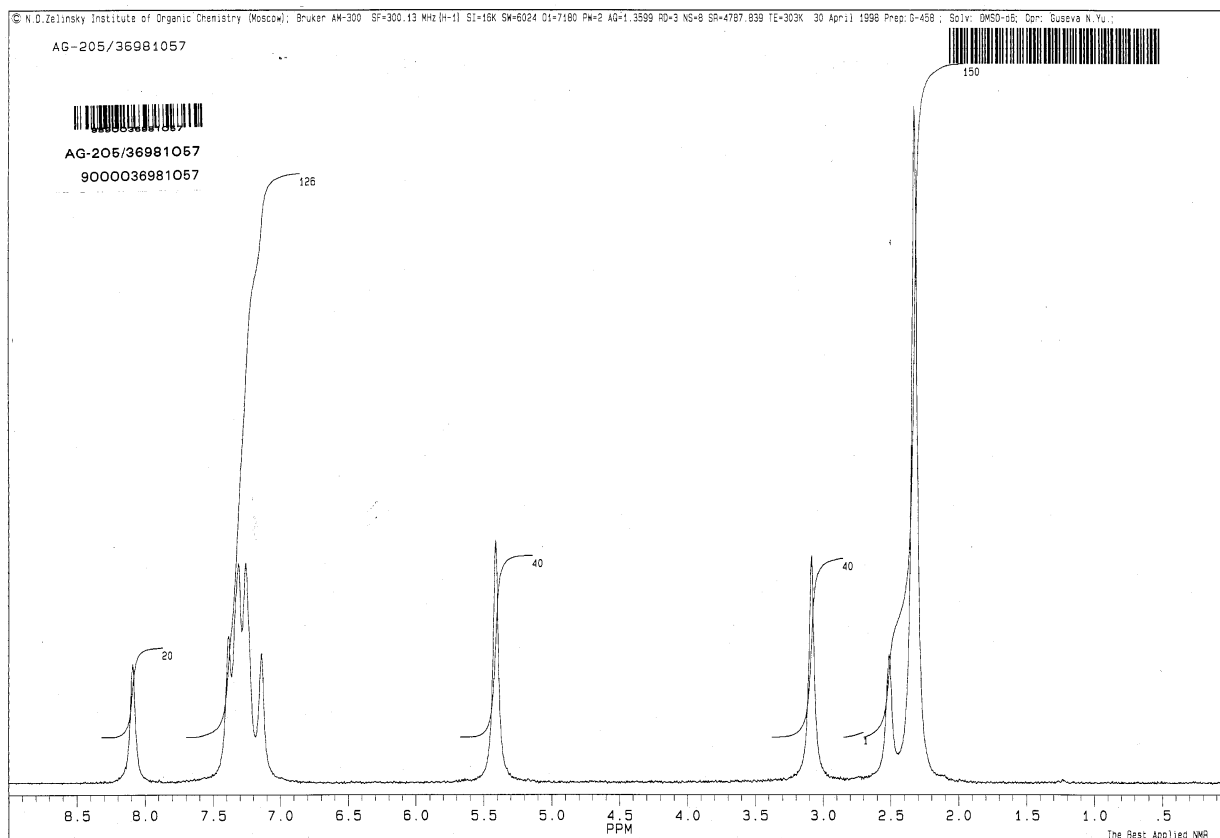

AG-205/36981057 NMR spectrum



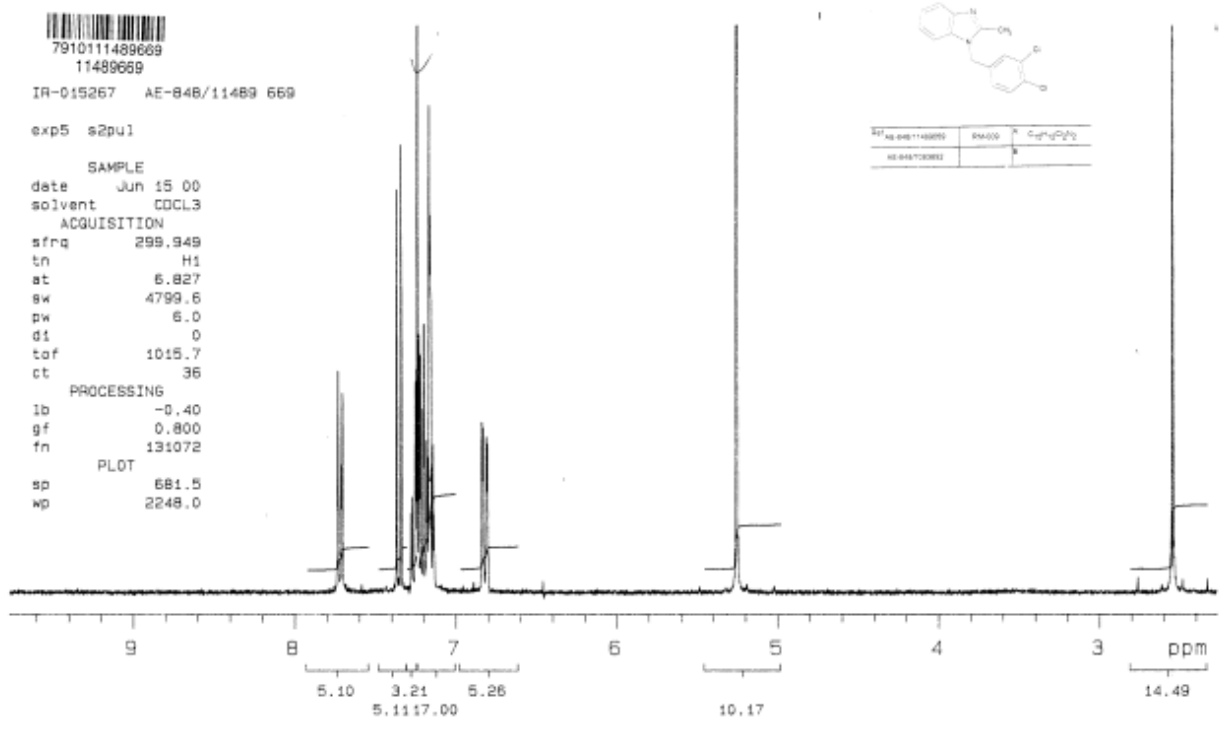

AE-848/11489669 NMR spectrum

IPCS RUTHEN LTD  
IR-007486 AE-848/369520

exp1 s2su1

SAMPLE  
date Sep 18 97  
solvent CDCl3  
AE-848/369520  
80000369520

ACQUISITION  
sfreq 299.949  
tn 911  
at 6.826  
sw 4800.2  
ph 13.5  
sl 3.300  
tof 1024.0  
cs 8

PROCESSING  
lb -0.40  
gf 0.000  
fn 131072  
PL07  
sp 1280.0  
wp 1126.2

AE-848-369520  
ProdCode: AE-848-369520  
MolWt: 244.24  
MolFormula: C14H12O2  
MolWeight: 244.24  
MolFormula: C14H12O2  
MolWeight: 244.24  
MolFormula: C14H12O2  
MolWeight: 244.24  
MolFormula: C14H12O2  
MolWeight: 244.24



Order No. 1000000000000000

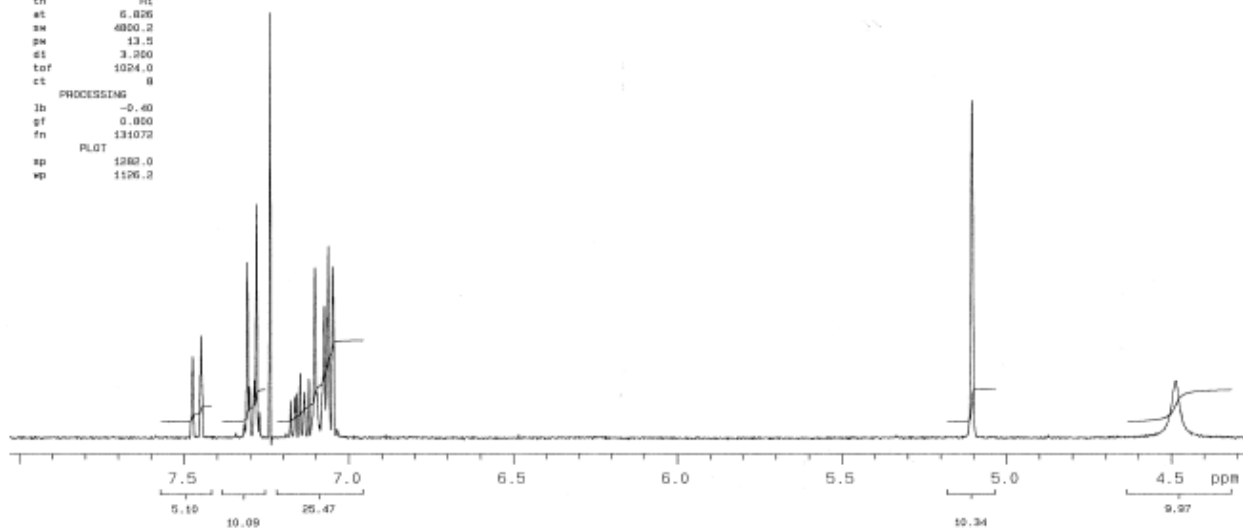

AE-848/369520 NMR spectrum

# 18. HPLC Analysis of Published Compounds

CH00562130

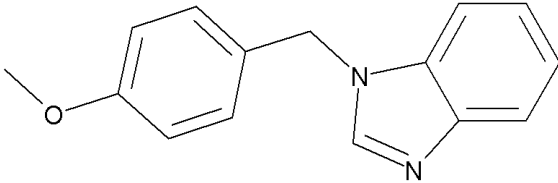

|    |         |          |                                                  |
|----|---------|----------|--------------------------------------------------|
| ID | 9075115 | 238.2916 | C <sub>15</sub> H <sub>14</sub> N <sub>2</sub> O |
|----|---------|----------|--------------------------------------------------|

Data File C:\HPCHEM\1\DATA\467\1FD-3001.D  
 Sample Name: CH005621P1-F-04  
 Instrument 1 10/09/2006 13:34:47 LCMS#1  
 Column: Chromolith SpeedROD C18 50x4.6mm | 3.75ml/min  
 Gradient: "A"->@2.2min->"B" (Hold 0.5min)->@0.1min->"A"->PostRun  
 PMP1, Solvent A : 0.1% TFA in AcN/Water (5:95)  
 PMP1, Solvent B : 0.1% TFA in AcN  
 PMP1, Solvent C : 10mM CH3COONH4 in AcN/Water (2.5:75.5)  
 PMP1, Solvent D : 10mM CH3COONH4 in AcN/Water (90:10)  
 Ionization mode : APCI Positive

Signal 1: ADC1 A, ELSD

| Peak #   | RetTime [min] | Type | Width [min] | Area [mV*s] | Height [mV] | Area %  |
|----------|---------------|------|-------------|-------------|-------------|---------|
| 1        | 1.143         | PP   | 0.0521      | 116.41392   | 34.76533    | 95.8423 |
| 2        | 1.529         | PP   | 0.0418      | 3.96096     | 1.49830     | 3.2610  |
| 3        | 2.562         | PP   | 0.0363      | 1.08921     | 4.64966e-1  | 0.8967  |
| Totals : |               |      |             | 121.46409   | 36.72859    |         |

Signal 2: DAD1 A, Sig=260,2 Ref=off

| Peak #   | RetTime [min] | Type | Width [min] | Area [mAU*s] | Height [mAU] | Area %  |
|----------|---------------|------|-------------|--------------|--------------|---------|
| 1        | 1.100         | PV   | 0.0643      | 4979.98828   | 1255.57410   | 91.5908 |
| 2        | 1.474         | VP   | 0.0568      | 457.22726    | 119.08273    | 8.4092  |
| Totals : |               |      |             | 5437.21555   | 1374.65683   |         |

Signal 3: MSD1 TIC, MS File

| Peak #   | RetTime [min] | Type | Width [min] | Area      | Height    | Area %   |
|----------|---------------|------|-------------|-----------|-----------|----------|
| 1        | 1.138         | PBA  | 0.0880      | 2.90206e7 | 5.55998e6 | 100.0000 |
| Totals : |               |      |             | 2.90206e7 | 5.55998e6 |          |

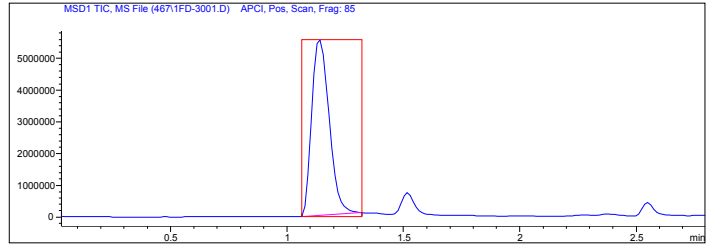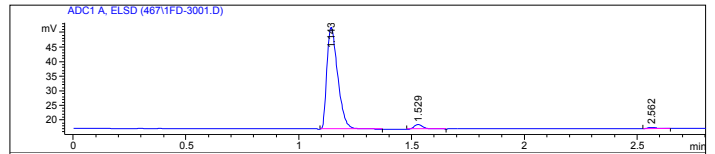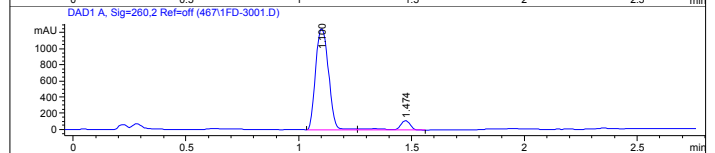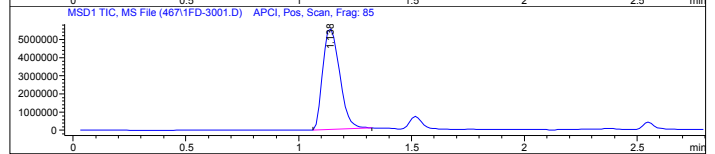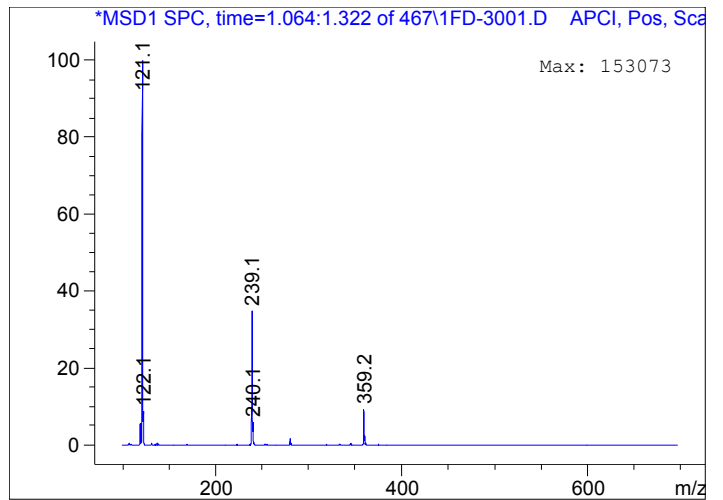

**Specs**

File:9900036981057  
Instrument:LC/MS B

ID:AG-205/36981057  
Vial:1:93

Description:C16H15ClN2  
Date:18-Jun-2004

Printed: Fri Jun 18 13:46:13 2004

**Sample Report (continued):**

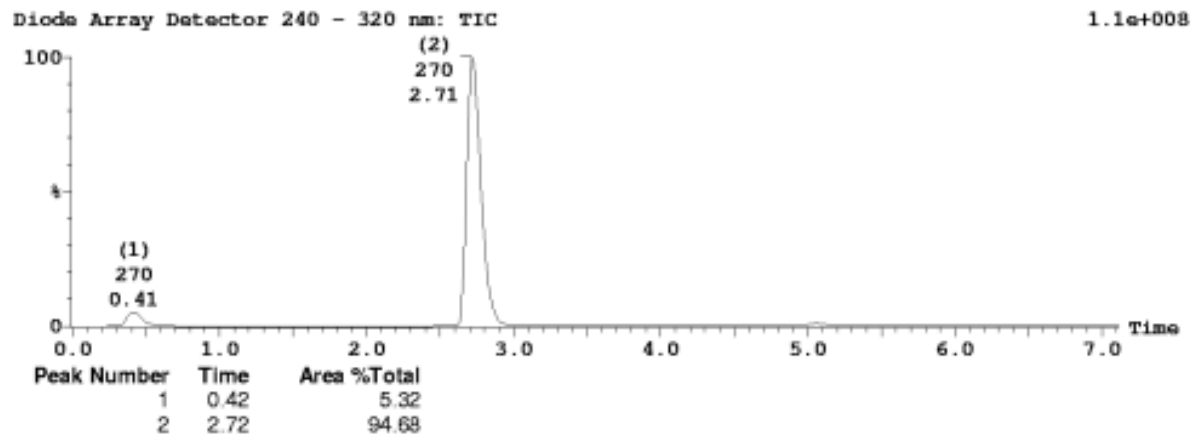

Peak ID Time Mass Found BPM

1 0.42 270.09 257

Combine (19:24-9:12)

1:MS ES+  
7.3e+003

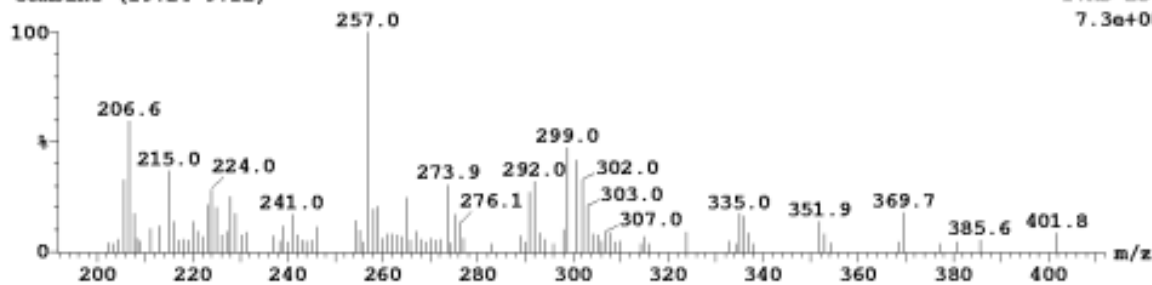

Peak ID Time Mass Found BPM

2 2.72 270.09 271

Combine (144:149-136:139)

1:MS ES+  
3.9e+006

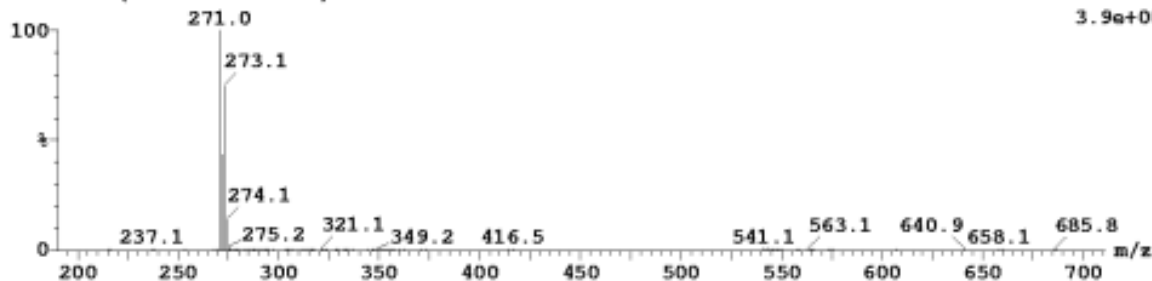

Printed: Fri Sep 08 13:01:23 2000

Sample Report (continued):

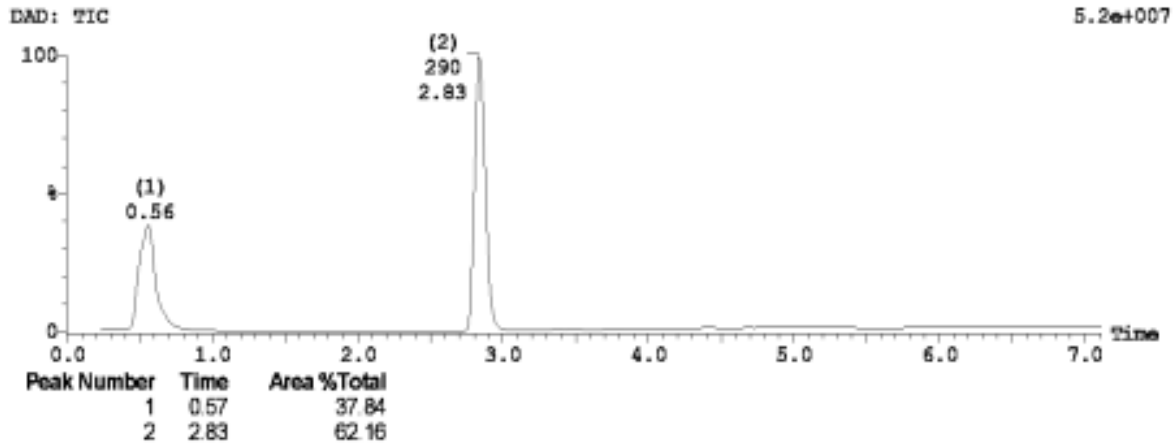

Peak ID Time Mass Found BPM  
 1 0.57 257.1

Combine (27:32-7:9)

1:MS 33+  
 7.5e+003

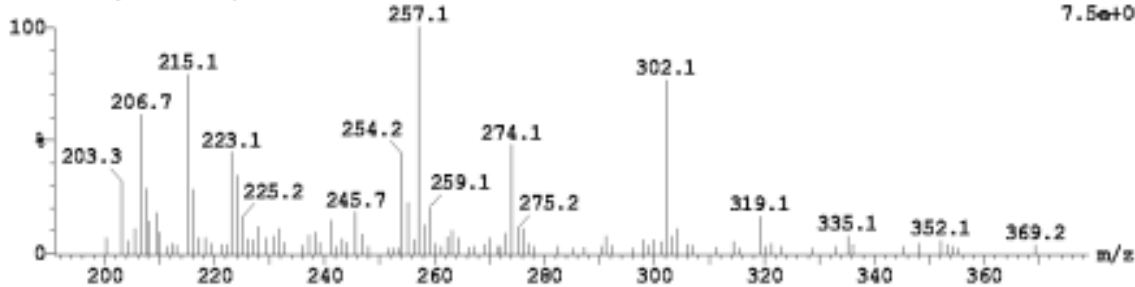

Peak ID Time Mass Found BPM  
 2 2.83 290.04 291.2

Combine (150:156-143:146)

1:MS 33+  
 7.8e+005

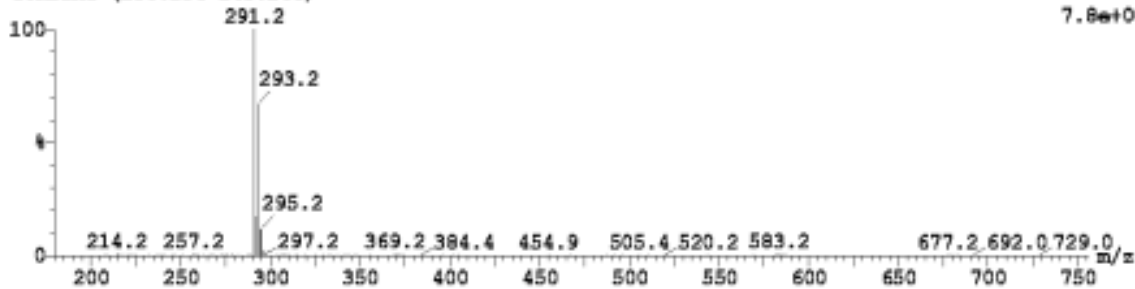

Supplement: NIHMS342507-supplement-1_si_001.pdf [file NIHMS342507-supplement-1_si_001.pdf]
